# Supplementary material
Source: publisher figshare collection journal article supplement (https://springernature.figshare.com/ndownloader/files/23040026)
Supplement: Supplementary file 1 [file 23040026]

## Sheet: Readme
Additional File 4 - Draft extraction sheet .

## Sheet: Extraction sheet
			Article info					Study Summary		Study location									Study design information		Timescale				Intervention and comparator							Outcome							Species							Study findings	BA or CI (ALT-CI, RCA, NR): Intervention
Article ID	Study ID	Full Citation	Citation	Authors	Year	Title	Publication Type	Objective	Study Validity Category	Country	State/Province	Climate zone	Waterbody name	Name of General Area	Waterbody type	Hydro dam name	Dam size	Operational Regime	Study Design	Study Class	Time since intervention (in years)	Sampling years	Monitoring duration (years)	Timescale Comment	Control site type	Intervention description	Treatment magnitude (m3/s)	Comparator magnitude (m3/s)	Other flow regime component alterations during same time period	If Unclear for other flow components alterations, why?	Comments (on other flow regime component alterations)	Outcome	Outcome metric	Outcome description (free form)	Comparison level	Sampling method	Outcome data type	Comments	Species-specific study? (Y/N)	N focal species	Genus	Species	Common name	Life stage	Comments		Intervention mean	Intervention deviance	Type of Outcome reported (mean, #)
[truncated: 51 more columns]

## Sheet: Codes sheet
Codes used in the database
Codes	Definitions
General codes
NR	not reported
UNCLEAR	unclear
Publication Type
ARTICLE	journal articles
THESIS	thesis (Masters or PhD)
CONF	conference proceeding
BOOK	book
BOOK CHAP	chapter in a book
REPORT	report (government, consultant)
OTHER	e.g., news article, presentation etc.
Study validity category
HIGH
MEDIUM
LOW
Waterbody type
RIVER	river or stream or creeks
ESTUARY	estuary
RESERV	reservoir or impoundment or canal
Dam size
VLH	very low head
LOW	low head
HIGH	high head
Operational Regime
RUN	run of river or modified run of river
STORAGE
PEAKING
Study design
BA	Before-after i.e., measured outcome before change/modification to flow and then again after within same waterbody (i.e., no control site comparator), including for example before and after (i) a hydroelectric facility is built, or (ii) a change/modification to an existing hydroelectric facility i.e., infrastructure or operational modification (e.g., a comparison between base level magnitude for a…
CI	Control-impact i.e., measures outcome at a control site/section of a waterbody (e.g., waterbody with no intervention or the base level) and an impacted site/section (i.e., no BA comparison - no before data); all impact sites the same (i.e., same intervention/level of exposure)
CI ̶̶ gradient	Gradient of intervention intensity including "zero-control"-sites across different waterbodies
BACI	Before-After-Control-Impact i.e., combination of BA and CI; often statistically compared by testing the site:period interaction term.
RCT	randomized control trial
RCA	Reference conditional approach (RCA) compares metrics from a site of interest to metric values for many reference sites that are not exposed to the stressor or management action. The most common application uses community composition of benthic invertebrates as the metric, but it could also be applied to other taxa, including fish, provided that dispersal or access do not limit species distributi…
NR	Normal range design i.e., a variant of the RCA involves using a normal range of conditions or identified benchmarks rather than continued sampling of reference sites. To accomplish this, an expected value or range of values needs to be scientifically established from (i) sampling of appropriate reference sites, (ii) laboratory or field studies that can be used to identify optimal values, or (iii)…
ALT-CI	an alternative level of intervention on different study waterbodies (e.g., comparison between two different but unmodified discharge ratesi.e., comparison of current discharge rate of a hydro dam vs. a faster discharge rate).
ALT-BA	an alternative level of intervention on the same waterbody (e.g., a comparison between one flow magnitude before (which is not no magnitude or base level magnitude) vs. an alternate level magnitude after)
Study Class
MAN	The researcher has control over the variable of interest and the response to manipulating it is measured (looking forward in time)
NON_MAN	Sometimes called observational or natural experiments, occur when the researcher takes advantage of changes that have happened (by using existing data) or are about to happen (by taking measurements, i.e. making observations) to understand its effect (retrospecitive)
Time since intervention
<1
1
2
3
4
>4
Control site type
NO_HYDRO	A different nearby waterbody with no hydro infrastructure
DOWNSTREAM	downstream condition i.e., unmodified sections of the study waterbody
UPSTREAM	upstream condition i.e., unmodified sections of the study waterbody
UP+DOWNSTREAM	both up- and downstream control sites were used (i.e., unmodified sections of the study waterbody)
ALT_HYDRO	a different nearby waterbody with hydro infrastructure operating at a different but unmodified flow magnitude
N/A	not applicable if used a BA or ALT-BA
Other flow regime component alterations
YES	There are other flow regime component alterations during same time period as magnitude changes/modifications, but authors isolate impacts (i.e., have quantitative values for other components).
NO	Magnitude is the only flow regime alteration at site/time period.
UNCLEAR	The study (1) does not specify a flow component [e.g., the study compares an unregulated stream (or section of a stream) to a regulated stream (i.e., regulated via a hydro dam)], or (2) reports unspecified multiple components affecting flow (i.e., do not report effects of components separately to isolate individual impacts of flows components).
If Unclear for other flow components alterations, why?
UNREG	The study does not specify a flow component [e.g., the study compares an unregulated stream (or section of a stream) to a regulated stream (i.e., regulated via a hydro dam)]
UNSPEC	The study reports unspecified multiple components affecting flow (i.e., do not report effects of components separately to isolate individual impacts of flows components)
NR	Not reported in study.
Outcome
BIOMASS	metrics related to biomass, yield
ABUND	abundance, density, CPUE (total #s, of just 1 age class), presence/absence, number of eggs when eggs are considered an age class and not part of a spawning event
DIVERS	diversity metrics (e.g., Shannon and Simpson indices); Diversity or richness that was transformed or corrected, for example using jackknife estimates, was also regarded as relevant; The following specific outcomes were not considered eligible since they are measures of beta diversity: Jaccard’s diversity index (a measure of species turnover rather than diversity); similarity indices, such as Sore…
RICH	richness (# of species or groups of interest); Studies which reported a representative list of species in the study area based on standard survey methods suitable for the taxa of study were included in the review, and the outcome was used as a measure of species richness, even if authors did not provide a total of the number of species listed or refer to species richness explicitly.
COMP	composition
Outcome metric
BIOMASS	biomass
YIELD	yield
ABUND	abundance
DENSITY	density
CPUE	catch per unit effort (
PRES	Presence/absence
#EGGS	number of eggs when eggs are considered an age class and not part of a spawning event
SHANNON
SIMPSON
RICH	total number of the species in a community
COMP	composition
Comparison level
SPECIES	For diversity, richness,composition outcomes, comparisons were made at the species level
GENERA	For diversity, richness,composition outcomes, comparisons were made at the genera level
FAMILY	For diversity, richness,composition outcomes, comparisons were made at the family level
ORDER	For diversity, richness,composition outcomes, comparisons were made at some other level e.g., functional type
OTHER	For diversity, richness,composition outcomes, comparisons were made at the order level
N/A	For abundance and biomass outcomes
Sampling method
GEAR	active and/or passive gear (e.g. Electrofishing, gill-, fyke-, seine-netting, trapping)
ANGLING	angling
TELEM	telemetry (acoustic or radio)
VISUAL	observation, snorkelling, underwater cameras, electronic counter
MARK	mark-recapture (e.g., fin clipping)
PIT	passive integrated transponder tags
OTHER	e.g., commercial fishery catch data that does not specify method(s) used; specify method in comments column if OTHER selected. Other examples include: passive acoustic recorders, hydroacoustics (such as SONAR)
Outcome data type
QUANT	outcomes for treatment and comparator groups are reported as quantitative values
SEMI_QUANT	outcomes are reported as semi-quantitative values (e.g., presence before and a quantiative value after a change in flow)
QUAL	outcomes for treatment and comparator groups are reported as qualitative descriptors (e.g., presence/absence before and after a chagne in flow)
Life stage
EGG	Eggs, nests/redds (note: Eggs to Age 0 = REPRO)
LARV	Larvae, Alevins, free embryos
AGE0	Fry, Parr (0+), Age0+, YOY
JUV	Age 1+, Parr (1+), Juvenile, fingerling (if specific developmental stage not identified), smolt. (Note: > Age 0 = SURV)
ADULT	adult, spawner, kelt
MIXED	assortment of life stages
VARIOUS	>2 stages reported separately for at least 1 outcome
NR	not reported
